# Supplementary material for: Effects of hypothermia on gene expression in zebrafish gills:upregulation in differentiation and function of ionocytes as compensatory responses
Source: Oxford University Press journal article supplement (doi:10.1242/jeb.019950), 2008-09-19
Supplement: jeb019950-sup-019950-tables1.pdf [file jeb019950-sup-019950-tables1.pdf]

Table S1. Primer sequences of quantitative reverse-transcription polymerase chain reaction (qRT-PCR) experiment

| Gene name        | Forward primer sequences (5'–3') | Reverse primer sequences (5'–3') |
|------------------|----------------------------------|----------------------------------|
| <i>β-actin</i>   | ATTGCTGACAGGATGCAGAAG            | GATGGTCCAGACTCATCGTACTC          |
| <i>cirbp</i>     | TCATCGGTGGTCTGAGCTATG            | AGATTTGCCAGCTTCATCAAC            |
| <i>hmgb1</i>     | AGAGGAGGAGGATGACGAGTAG           | GGACGAACACAGATGACTTTC            |
| <i>atp2a1l</i>   | TCACTTCAATGACCCCGTTCA            | TTGGCCATACGTCTGGTACCA            |
| <i>atp2a1</i>    | TCTGATCCCAGTTCAGCTGCT            | CATAACCTCCAATGGCCAGGT            |
| <i>atp6v1a</i>   | GAGGAACCACTGCCATTCCA             | CAACCCACATAAATGATGACATCG         |
| <i>krt18</i>     | TGACACCAACCTGAACCGCAT            | AGGAGCATCAACATCCACCTGC           |
| <i>anxa2a</i>    | AGACTGCAAGACGCCATGAA             | C CCTTTGTGTGCTCAGCAATG           |
| <i>gbp</i>       | TGGTTTGTCTGGAATGGTGC             | AAAAGGTGTGACCCGTTGCCT            |
| <i>gtpbp4</i>    | TAAATACTTGCGCTGGCAGGT            | TCCGCACTGCTCTGAAACATC            |
| <i>tuba8l2</i>   | GCTCATCTCAGGAAAGGAGGA            | CGAAACTGTGGAAGACCAGGA            |
| <i>atp1a1a.4</i> | GGTTCTGCGCCTTCCCATATT            | TGTTTCTTGTTCACCCAACCT            |
| <i>atp1b1b</i>   | CCAGGGTTTAATTTGGGCTG             | GTTTGGGATCATTGTCTTGCTG           |
| <i>gcm2</i>      | TCCCTGTGGTTATGACTTTGCA           | TGGACTTGAGCCATGAGACT             |
| <i>foxi3a</i>    | CTCTCGCTCAATGACTGCTTC            | CAGCCTGAGAGTCCGACTTTC            |
| <i>atp1a1a.2</i> | AGGAAGGTGCTCTGGCAGCTTT           | AGCGTATGGTAAGGCAGTGAAC           |
| <i>trpv6</i>     | TCCTTTCCCATCACCTCT               | GCACTGTGGCAACTTTCGT              |
| <i>slc12a3</i>   | GCCCCAAAGTTTTCCAGTT              | TAAGCACGAAGAGGCTCCTTG            |
| <i>ndrg1</i>     | TTGGAGCCGGTGCTTACATC             | TCAGGCATGGCATGAGTCC              |
| <i>ca15a</i>     | TCAGAACACACTGTGGATGGC            | TGCTTGCTTCATTTCGTTCCC            |
| <i>ca2</i>       | TCGTCTGCAAACAGTCCATCA            | TCCGAGAGGCCCTTCATTT              |
| <i>dlc</i>       | AAGATATGGCGCTCAGATCCA            | GGAACCAGCAATGTTGATTCAG           |
