# Supplementary material for: Effects of hypothermia on gene expression in zebrafish gills:upregulation in differentiation and function of ionocytes as compensatory responses
Source: Oxford University Press journal article supplement (doi:10.1242/jeb.019950), 2008-09-19
Supplement: jeb019950-sup-019950-tables2.pdf [file jeb019950-sup-019950-tables2.pdf]

Table S2. The lists of significantly expressed transcripts in zebrafish gill after 1 day or 30 days cold treatment

| Systematic name    | 1 day-2<br>(Cy5/Cy3) | 1 day-3<br>(Cy5/Cy3) | 1 day-<br>dyes<br>(Cy3/Cy5) | ZFIN                 | GeneID | NCBI           | GO term                                                                                                                                                                                                      | Description                                                                                 | Symbol     |
|--------------------|----------------------|----------------------|-----------------------------|----------------------|--------|----------------|--------------------------------------------------------------------------------------------------------------------------------------------------------------------------------------------------------------|---------------------------------------------------------------------------------------------|------------|
| obszebrafish#05462 | 2.202                | 2.461                | 2.649                       |                      |        | BC051779.1     | Ion transport                                                                                                                                                                                                | ATPase, Ca <sup>2+</sup> transporting, cardiac muscle, fast twitch 1 like                   | atp2a11    |
| obszebrafish#07439 | 1.3                  | 2.427                | 2.736                       |                      |        | NM_001007029.1 | Metabolism; cation transport; proton transport; calcium ion transport; calcium ion homeostasis; response to mechanical stimulus; regulation of muscle contraction; negative regulation of muscle contraction | ATPase, Ca <sup>2+</sup> transporting, cardiac muscle, fast twitch 1                        | atp2a1     |
| obszebrafish#11950 | 2.538                | 3.763                | 1.629                       | ZDB-GENE-030131-4400 | 325675 | BC066384.1     | Ion transport                                                                                                                                                                                                | collagen, type I, alpha 3                                                                   | col1a3     |
| obszebrafish#07049 | 2.287                | 1.092                | 2.601                       | ZDB-GENE-000906-4    | 58023  | NM_131511.1    | Cell surface receptor linked signal transduction                                                                                                                                                             | frizzled homolog 9                                                                          | fzd9       |
| obszebrafish#10782 | 2.108                | 1.036                | 2.193                       |                      |        | CR388060.19    |                                                                                                                                                                                                              | Zebrafish DNA sequence from clone DKEY-208J8 in linkage group 16, complete sequence         |            |
| obszebrafish#04853 | 2.18                 | 1.009                | 2.002                       | ZDB-GENE-020111-4    | 140817 | NM_131887.1    | Cellular metabolic process (regulation of transcription, DNA-dependent)                                                                                                                                      | CCAAT/enhancer binding protein (C/EBP), delta                                               | cebpd      |
| obszebrafish#03108 | 1.089                | 3.118                | 2.223                       |                      |        | CR450814.4     |                                                                                                                                                                                                              | Zebrafish DNA sequence from clone CH211-157B11 in linkage group 6, complete sequence        |            |
| obszebrafish#09380 | 2.385                | 2.193                | 0.928                       |                      |        | NM_001008590.1 | Biological process                                                                                                                                                                                           | zgc:101867                                                                                  | zgc:101867 |
| obszebrafish#11671 | 2.208                | 1.354                | 4.03                        |                      |        | NM_001007427.1 | Biological process                                                                                                                                                                                           | zgc:101706                                                                                  | zgc:101706 |
| obszebrafish#07885 | 0.907                | 2.544                | 2.305                       |                      |        | CR450814.4     |                                                                                                                                                                                                              | Zebrafish DNA sequence from clone CH211-157B11 in linkage group 6, complete sequence        |            |
| obszebrafish#12211 | 2.058                | 2.147                | 0.856                       |                      | 560560 | XM_683958.1    |                                                                                                                                                                                                              | similar to 3-monooxygenase/tryptophan 5-monooxygenase activation protein, gamma polypeptide | LOC560560  |

The gene expression (Cy5/Cy3 ratio), ZFIN ID, GENE ID, NCBI accession number, GO term (according to its biological process), gene symbol and annotations of transcripts are shown. This file contains four tables including 1 day upregulation, 30 days upregulation, 1 day downregulation and 30 days downregulation.
